# Supplementary material
Source: PubMed Central journal article supplement (PMC8188889)
Supplement: NIHMS1570283-supplement-Supplementary_Material.pdf [file NIHMS1570283-supplement-Supplementary_Material.pdf]

## Supplementary Materials

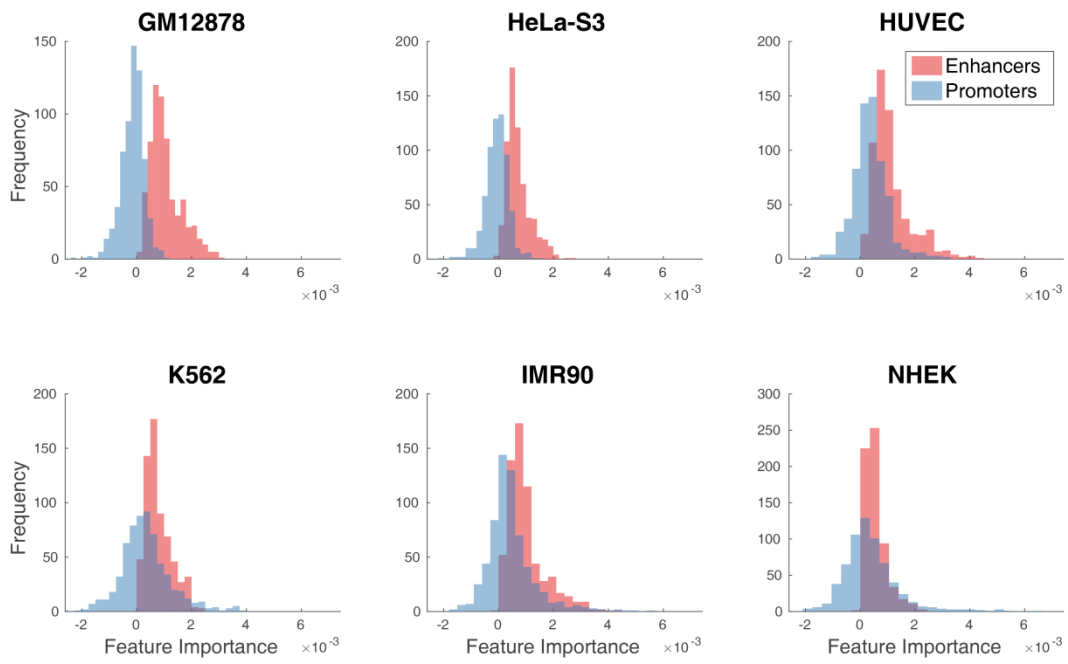

**Figure S1:** Distribution of feature importance scores for enhancers and promoters in each cell line.

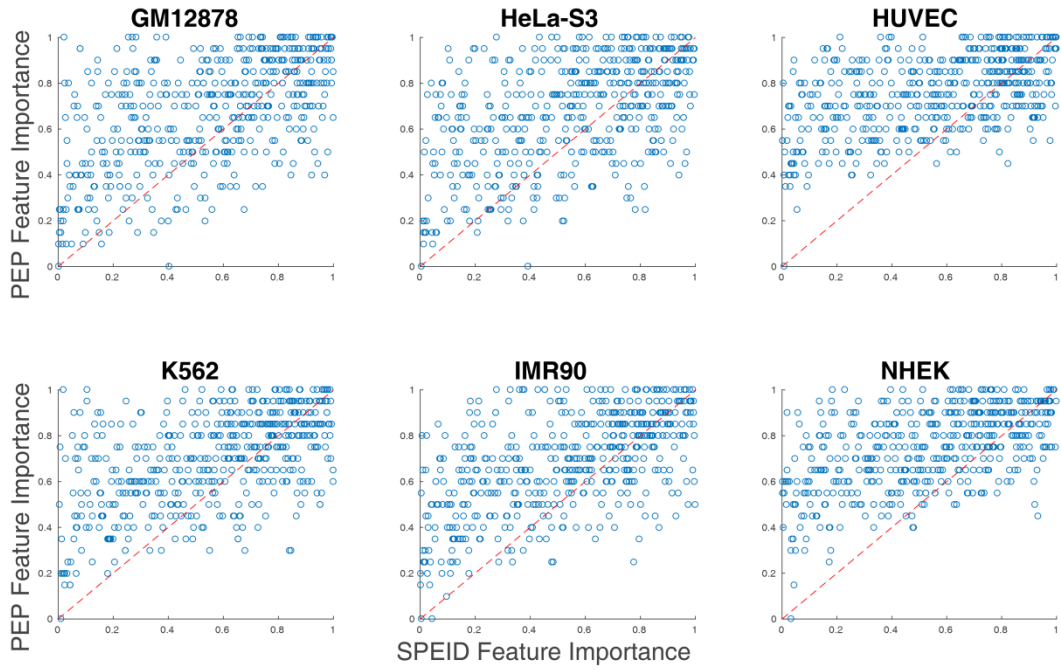

**Figure S2:** Comparison of feature importance scores between PEP and SPEID. The dotted line indicates the identity.

| Model                | Cell Type |         |       |       |      |      |
|----------------------|-----------|---------|-------|-------|------|------|
|                      | GM12878   | HeLa-S3 | HUVEC | IMR90 | K562 | NHEK |
| SPEID                | 0.85      | 0.81    | 0.75  | 0.78  | 0.85 | 0.94 |
| TargetFinder (E/P)   | 0.59      | 0.61    | 0.48  | 0.48  | 0.61 | 0.83 |
| TargetFinder (EE/P)  | 0.84      | 0.83    | 0.71  | 0.83  | 0.81 | 0.83 |
| TargetFinder (E/P/W) | 0.81      | 0.87    | 0.77  | 0.78  | 0.85 | 0.90 |
| PEP-Motif            | 0.83      | 0.85    | 0.73  | 0.80  | 0.81 | 0.84 |
| PEP-Word             | 0.82      | 0.83    | 0.74  | 0.82  | 0.81 | 0.86 |
| PEP-Integrate        | 0.84      | 0.85    | 0.75  | 0.84  | 0.82 | 0.88 |

**Table S1:**  $F_1$  scores of different EPI prediction methods for each cell line. SPEID and PEP results are reported on E/P/W dataset.

| Enhancers |         |         |       |      |       |      |
|-----------|---------|---------|-------|------|-------|------|
|           | GM12878 | HeLa-S3 | HUVEC | K562 | IMR90 | NHEK |
| GM12878   | 1.00    | 0.38    | 0.38  | 0.26 | 0.34  | 0.28 |
| HeLa-S3   | 0.38    | 1.00    | 0.37  | 0.24 | 0.35  | 0.33 |
| HUVEC     | 0.38    | 0.37    | 1.00  | 0.33 | 0.37  | 0.34 |
| K562      | 0.26    | 0.24    | 0.33  | 1.00 | 0.31  | 0.30 |
| IMR90     | 0.34    | 0.35    | 0.37  | 0.31 | 1.00  | 0.29 |
| NHEK      | 0.28    | 0.33    | 0.34  | 0.30 | 0.30  | 1.00 |
| Promoters |         |         |       |      |       |      |
|           | GM12878 | HeLa-S3 | HUVEC | K562 | IMR90 | NHEK |
| GM12878   | 1.00    | 0.19    | 0.32  | 0.19 | 0.21  | 0.04 |
| HeLa-S3   | 0.19    | 1.00    | 0.18  | 0.14 | 0.17  | 0.03 |
| HUVEC     | 0.32    | 0.18    | 1.00  | 0.24 | 0.25  | 0.10 |
| K562      | 0.19    | 0.14    | 0.24  | 1.00 | 0.25  | 0.16 |
| IMR90     | 0.21    | 0.17    | 0.25  | 0.25 | 1.00  | 0.13 |
| NHEK      | 0.04    | 0.03    | 0.10  | 0.16 | 0.13  | 1.00 |

**Table S2:** Rank-correlations between importances of features cross cell lines.

| Chromosome | Enhancer Start | Enhancer End | Promoter Start | Promoter End | Number of Patients |
|------------|----------------|--------------|----------------|--------------|--------------------|
| chr1       | 26221800       | 26222200     | 26324400       | 26324800     | 3                  |
| chr1       | 26222200       | 26222400     | 26324400       | 26324800     | 3                  |
| chr1       | 26223200       | 26223400     | 26324400       | 26324800     | 3                  |
| chr9       | 107914000      | 107914200    | 107690400      | 107690600    | 3                  |
| chr9       | 107917000      | 107917200    | 107690400      | 107690600    | 3                  |
| chr9       | 107917200      | 107917600    | 107690400      | 107690600    | 3                  |
| chr9       | 107917600      | 107917800    | 107690400      | 107690600    | 3                  |
| chr16      | 58055200       | 58055600     | 58163200       | 58163600     | 6                  |
| chr16      | 58055800       | 58057200     | 58163200       | 58163600     | 4                  |
| chr16      | 58057200       | 58057400     | 58163200       | 58163600     | 4                  |
| chr16      | 67701800       | 67702000     | 67840400       | 67841000     | 4                  |
| chr16      | 67702000       | 67702400     | 67840400       | 67841000     | 3                  |
| chr16      | 67706800       | 67707000     | 67840400       | 67841000     | 4                  |
| chr16      | 67707400       | 67707800     | 67840400       | 67841000     | 3                  |
| chr16      | 67710400       | 67710600     | 67840400       | 67841000     | 4                  |
| chr16      | 67710600       | 67710800     | 67840400       | 67841000     | 5                  |
| chr19      | 4575600        | 4576000      | 4639200        | 4639600      | 3                  |
| chr19      | 6516000        | 6516200      | 6737600        | 6737800      | 5                  |
| chr19      | 6517200        | 6517400      | 6737600        | 6737800      | 4                  |
| chr19      | 6517400        | 6518400      | 6737600        | 6737800      | 3                  |
| chr19      | 6519200        | 6519600      | 6737600        | 6737800      | 4                  |
| chr19      | 6519600        | 6519800      | 6737600        | 6737800      | 3                  |
| chr20      | 9958800        | 9959200      | 10414800       | 10415800     | 3                  |
| chr22      | 42095200       | 42095800     | 42342800       | 42343200     | 3                  |
| chrX       | 150922000      | 150922600    | 151999000      | 151999600    | 3                  |
| chrX       | 150922600      | 150923400    | 151999000      | 151999600    | 3                  |
| chrX       | 151808200      | 151808400    | 151999000      | 151999600    | 3                  |

**Table S3:** Positions of the EPIs which are possibly disrupted in at least 3 patients. The position of an EPI includes the chromosome of the enhancer/promoter, the start and end positions of the enhancer, and the start and end positions of the paired promoter. The number of patients where the corresponding EPI is possibly disrupted in also shown.

| Cell Line ID | Sample name | Sample group   | Epigenome mnemonic |
|--------------|-------------|----------------|--------------------|
| 29           | E029        | HSC & B-cell   | BLD.CD14.PC        |
| 30           | E030        | HSC & B-cell   | BLD.CD15.PC        |
| 32           | E032        | HSC & B-cell   | BLD.CD19.PPC       |
| 34           | E034        | Blood & T-cell | BLD.CD3.PPC        |
| 36           | E036        | HSC & B-cell   | BLD.CD34.CC        |
| 46           | E046        | HSC & B-cell   | BLD.CD56.PC        |
| 50           | E050        | HSC & B-cell   | BLD.MOB.CD34.PC.F  |
| 51           | E051        | HSC & B-cell   | BLD.MOB.CD34.PC.M  |
| 114          | E116        | ENCODE2012     | BLD.GM12878        |
| 121          | E123        | ENCODE2012     | BLD.K562.CNCR      |

**Table S4:** Additional JEME [55] cell lines used to evaluate robustness of SPEID to dataset construction. To construct these additional cell lines, we used data from JEME, which collected 127 human cell types, tissue types and cell lines from ENCODE and Roadmap Epigenomics. An elastic net method, was used to predict enhancer-TSS (transcription start site) interactions. We performed filtering based on the confidence score of each connection pair, and removing all pairs with confidence scores less than 0.5. Then, we chose 10 cell lines that have top 10 largest number of enhancer-TSS pairs remained and use them as our EPI positive dataset. Finally, we constructed the negative dataset to satisfy 4 constraints:

1. Promoter variety control (i.e., all promoters that appear in the negative dataset should also appear in the positive dataset)
2. Enhancer variety control (i.e., all enhancers that appear in the negative dataset should appear in the positive dataset)
3. Promoter frequency control (i.e., the occurrence frequency of each promoter in the negative dataset should be the same as that in the positive dataset)
4. Enhancer frequency control (i.e., the occurrence frequency of each enhancer in the negative dataset should be the same as that in the positive dataset)

| Cell Line ID | Sample Size | Prediction Accuracy |
|--------------|-------------|---------------------|
| 29           | 49379       | 0.557 (+/- 0.0097)  |
| 30           | 43577       | 0.592 (+/- 0.0101)  |
| 32           | 46905       | 0.612 (+/- 0.0096)  |
| 34           | 43221       | 0.596 (+/- 0.0101)  |
| 36           | 38618       | 0.612 (+/- 0.0106)  |
| 46           | 38775       | 0.621 (+/- 0.0105)  |
| 50           | 48602       | 0.556 (+/- 0.0098)  |
| 51           | 47307       | 0.539 (+/- 0.0100)  |
| 114          | 48055       | 0.600 (+/- 0.0096)  |
| 121          | 67185       | 0.597 (+/- 0.0081)  |

**Table S5:** Prediction performance of SPEID on additional cell lines constructed from JEME.
